# Supplementary material
Source: MDPI journal article supplement (https://www.mdpi.com/2037-0164/13/4/49)
Supplement: s1 [file s1]

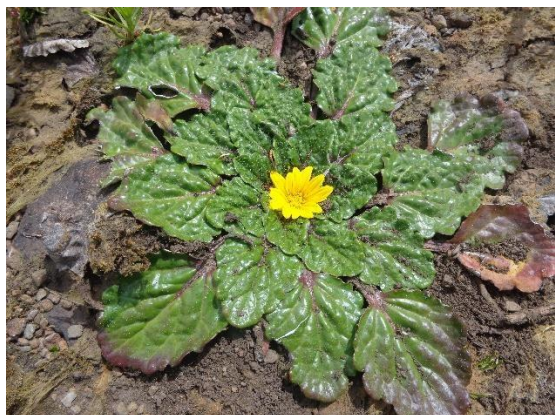

**A**

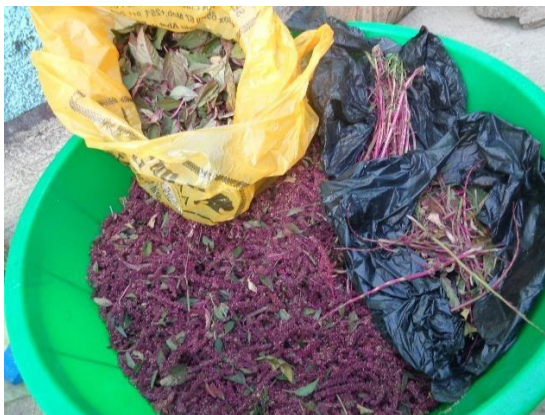

**B**

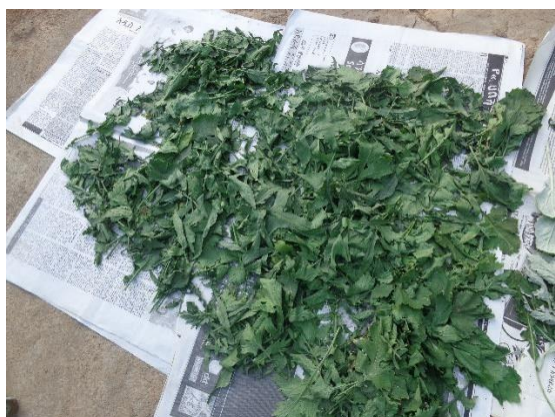

**C**

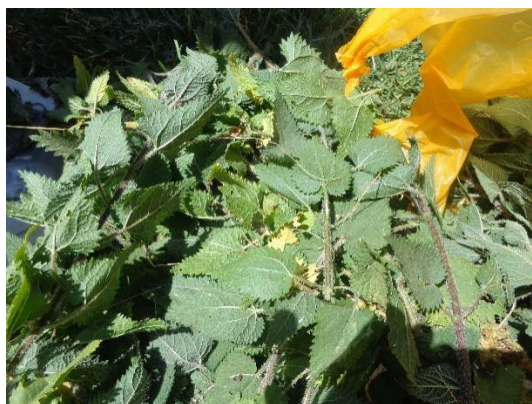

**D**

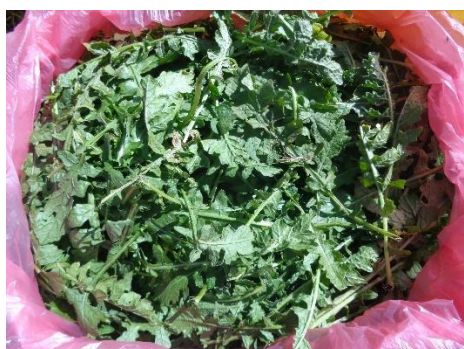

**E**

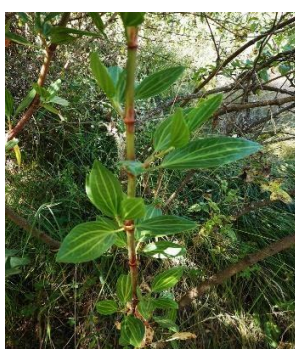

**F**

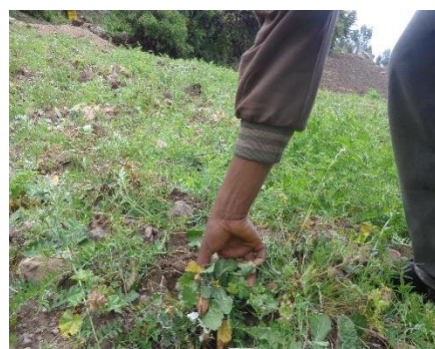

**G**

**Figure S1. Images of selected wild edible plants** (A = *Haplocarpha rueppelii*, B = *Amaranthus hybridus*, C = *Erucastrum arabicum*, D = *Urtica simensis*, E = *Erucastrum abyssinicum*, F = *Rumex nervosus* and G = *Haplocarpha schimperi*).

**Table S1. Ethnobotanical information of selected wild edible plants.**

| No. | Wild Edible Plants            | Family        | Local name (Amharic) | Growth form | Parts used         | Mode of consumption                | Place where WEPs collected from                                 | Season of Collection |
|-----|-------------------------------|---------------|----------------------|-------------|--------------------|------------------------------------|-----------------------------------------------------------------|----------------------|
| 1   | <i>Amaranthus hybridus</i>    | Amaranthaceae | Aluma                | Shrub       | Leaf<br>Seed       | Boiling<br>Fermentation and baking | Yimrhane Kirstos Forest and Abune Yosef mountain                | Dry season           |
| 2   | <i>Erucastrum abyssinicum</i> | Brassicaceae  | Wofe                 | Herb        | Leaf               | Boiling                            | Abune Yosef and Abuye Gara Mountains                            | Rainy season         |
| 3   | <i>Erucastrum arabicum</i>    | Brassicaceae  | Yewof Zer            | Herb        | Leaf               | Boiling                            | Abune Yosef and Abuye Gara Mountains                            | Rainy season         |
| 4   | <i>Haplocarpha rueppelii</i>  | Asteraceae    | Yahiya Getn          | Herb        | Leaf               | Boiling                            | Abune Yosef and Abuye Gara Mountains and grazing lands of Lasta | Dry season           |
| 5   | <i>Haplocarpha schimperi</i>  | Asteraceae    | Yebeg Getn           | Herb        | Leaf               | Boiling                            | Abune Yosef and Abuye Gara Mountains                            | Rainy season         |
| 6   | <i>Rumex nervosus</i>         | Polygonaceae  | Embacho              | Shrub       | Stem (Young shoot) | Raw                                | Forest and Grazing land                                         | Dry season           |
| 7   | <i>Urtica simensis</i>        | Urticaceae    | Samat/<br>Sama       | Herb        | Leaf               | Boiling                            | Abune Yosef and Abuye Gara Mountains and grazing lands of Lasta | Dry season           |
